# Supplementary material for: The Heterogeneous HLA Genetic Makeup of the Swiss Population
Source: PLoS One. 2012 Jul 25;7(7):e41400. doi: 10.1371/journal.pone.0041400 (PMC3405111; doi:10.1371/journal.pone.0041400)
Supplement: Supporting Information S10 — Single locus ANOVA's. (DOC) [file pone.0041400.s010.doc]

**Supporting Information S10 – Single locus ANOVA’s**

Genetic diversity within geographic or linguistic groups (FSC) and among geographic or linguistic groups (FCT) and their significance, for different partitions defined a priori.

List of abbreviations used in below table:

CTS: regional services for blood transfusion

#: CF and FR not tested because of small sample sizes

*: BS and ZH not tested because of HWE rejection

§: ZH not tested because of HWE rejection

n: number of donors

N: number of geographic or linguistic groups tested

NA: The number of donors available at each of the 5 loci is used for the computations.

| **West *vs* East** | | | | | |
| --- | --- | --- | --- | --- | --- |
|  | CTS | n | N | FCT (%) | FSC (%) |
| 5 loci | 9/11/12 | NA | 2 | 0.0013 (P=0.441) | 0.141 (P=1.47E-12) |
| HLA-A | 11# | 2488 | 2 | 0.07 (P=0.054) | 0.11 (P=0.015) |
| HLA-B | 9#* | 2328 | 2 | 0.01 (P=0.484) | 0.25 (P<0.0001) |
| HLA-C | 11# | 3512 | 2 | 0 (P=0.533) | 0.09 (P=0.0006) |
| HLA-DRB1 | 12§ | 16732 | 2 | 0 (P=0.813) | 0.11 (P<0.0001) |
| HLA-DQB1 | 11# | 1808 | 2 | 0 (P=0.595) | 0.14 (P=0.016) |
|  |  |  |  |  |  |
| **Far-West *vs* Centre *vs* South *vs* North *vs* Far-East** | | | | | |
|  | CTS | n | N | FCT (%) | FSC (%) |
| 5 loci | 9/11/12 | NA | 5 | 0.054 (P=0.012) | 0.094 (P=2.99E-10) |
| HLA-A | 11# | 2488 | 5 | 0.02 (P=0.392) | 0.13 (P=0.022) |
| HLA-B | 9#* | 2328 | 2 | 0.07 (P=0.161) | 0.19 (P<0.0001) |
| HLA-C | 11# | 3512 | 5 | 0 (P=0.436) | 0.08 (P=0.006) |
| HLA-DRB1 | 12§ | 16732 | 2 | 0.06 (P=0.007) | 0.05 (P<0.0001) |
| HLA-DQB1 | 11# | 1808 | 5 | 0.13 (P=0.058) | 0 (P=0.422) |
|  |  |  |  |  |  |
| **Alps *vs* Plateau & Jura** | | | | | |
|  | CTS | n | N | FCT (%) | FSC (%) |
| 5 loci | 9/11/12 | NA | 2 | 0.138 (P=0.0001) | 0.1 (P=1.87E-10) |
| HLA-A | 11# | 2488 | 2 | 0.05 (P=0.135) | 0.12 (P=0.003) |
| HLA-B | 9#* | 2328 | 2 | 0.05 (P=0.143) | 0.23 (P<0.0001) |
| HLA-C | 11# | 3512 | 2 | 0.13 (P=0.005) | 0.04 (P=0.034) |
| HLA-DRB1 | 12§ | 16732 | 2 | 0.08 (P=0.033) | 0.07 (P<0.0001) |
| HLA-DQB1 | 11# | 1808 | 2 | 0.38 (P=0.007) | 0.03 (P=0.268) |
|  |  |  |  |  |  |
| **French *vs* German *vs* Italian** | | | | | |
|  | CTS | n | N | FCT (%) | FSC (%) |
| 5 loci | 9/11/12 | NA | 3 | 0.098 (P=1.46E-05) | 0.095 (P=8.64E-11) |
| HLA-A | 11# | 2488 | 3 | 0.02 (P=0.279) | 0.13 (P=0.004) |
| HLA-B | 9#* | 2328 | 2 | 0.1 (P=0.063) | 0.2 (P<0.0001) |
| HLA-C | 11# | 3512 | 3 | 0.08 (P=0.032) | 0.05 (P=0.018) |
| HLA-DRB1 | 12§ | 16732 | 2 | 0.1 (P=0.0001) | 0.05 (P<0.0001) |
| HLA-DQB1 | 11# | 1808 | 3 | 0.19 (P=0.03) | 0.05 (P=0.191) |
